# Supplementary material for: Morphology and electronic modulation of composite nanosheets for electrocatalytic oxygen evolution through partial and in situ transformation of NiFe-LDH
Source: Royal Society of Chemistry journal article supplement (doi:10.1039/d0ce01850c), 2021-01-01
Supplement: d0ce01850c1.pdf [file d0ce01850c1.pdf]

## Supporting Information

### **Morphology and electronic modulation of composite nanosheets for electrocatalytic oxygen evolution through partial and in-situ transformation of NiFe-LDH**

Xiaodong Yang<sup>a,#</sup>, Zihan Zhao<sup>a,#</sup>, Qi Shen<sup>a,\*</sup>, Chen Xu<sup>a</sup>, Chuanxin Shi<sup>a</sup>,  
Wenwen Cao<sup>a</sup>, Yiqiang Sun<sup>a,b,c,\*</sup>, Bo Xu<sup>a,\*</sup>

-----

a School of Chemistry and Chemical Engineering, University of Jinan, Shandong, Jinan, 250022, China

b School of Materials Science And Engineering, University of Jinan, Shandong, Jinan 250022, China

c Foshan (Southern China) Institute for New Materials, Foshan 528200, Guangdong, China

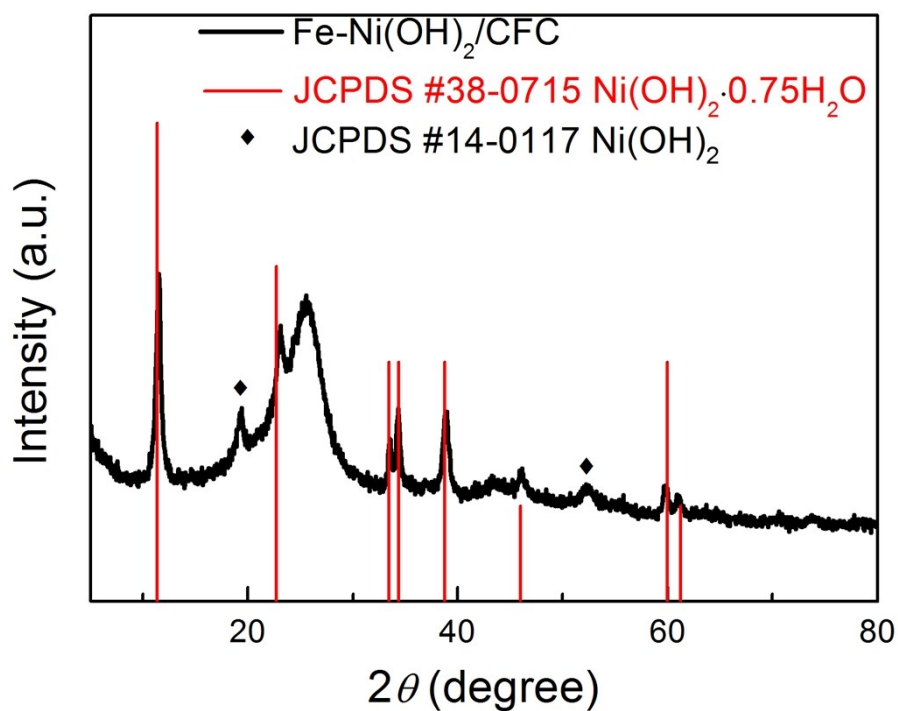

**Figure S1.** XRD diffraction pattern of Fe-Ni(OH)<sub>2</sub>/CFC and standard Ni(OH)<sub>2</sub>·0.75H<sub>2</sub>O characteristic peak (♦ represents the characteristic peak of Ni(OH)<sub>2</sub>).

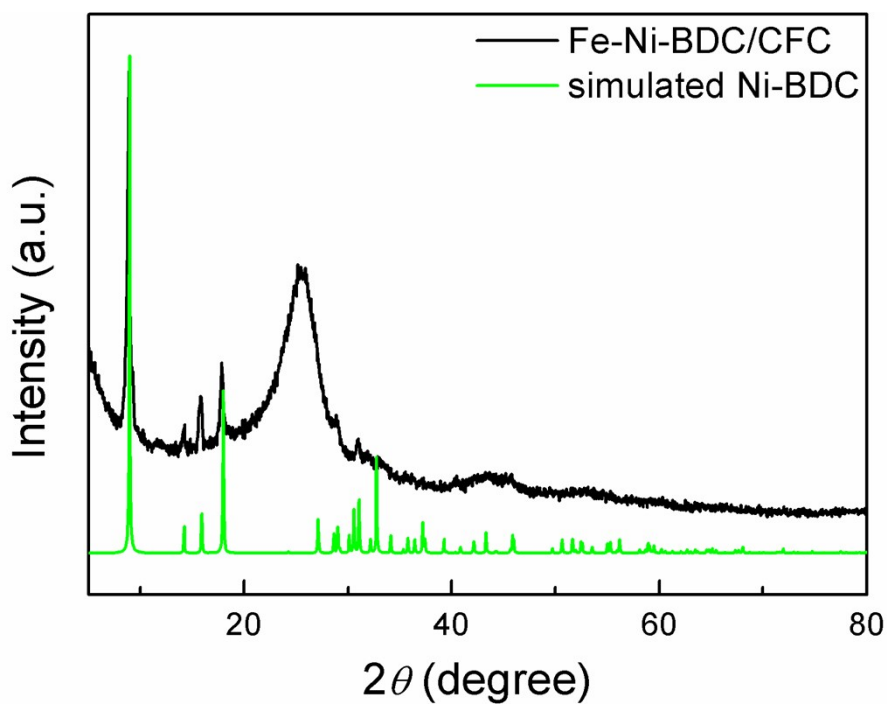

**Figure S2.** XRD diffraction pattern of Fe-Ni-BDC/CFC with standard simulated

curve.

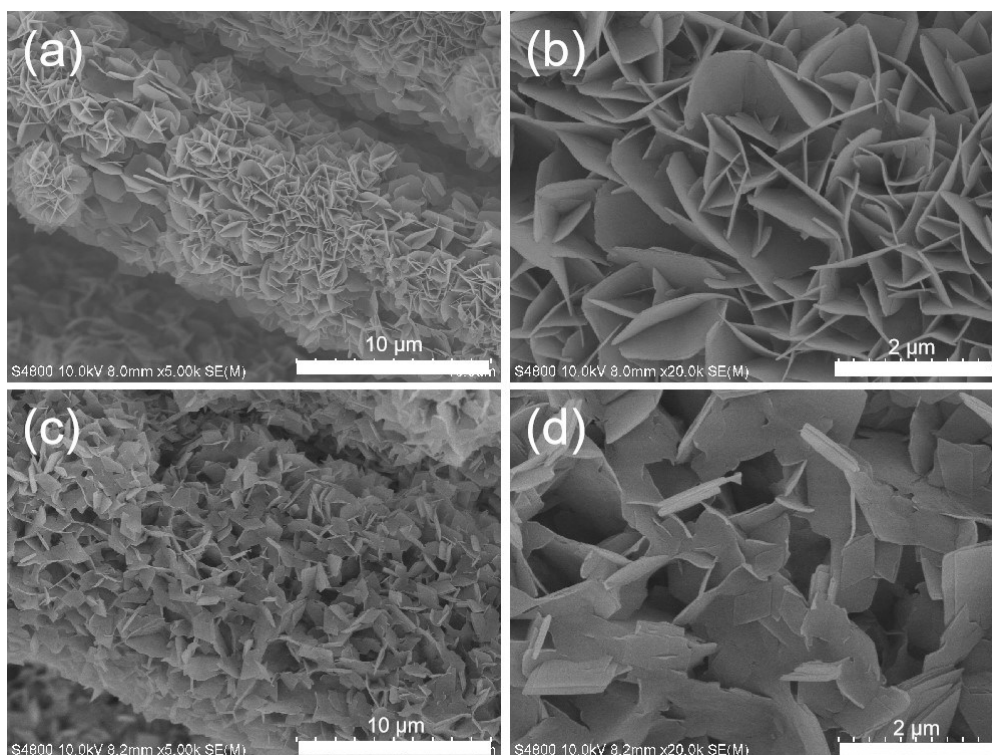

**Figure S3.** (a, b) SEM images with different magnifications of Fe-Ni(OH)<sub>2</sub>/CFC with different magnifications; (c, d) SEM images with different magnifications of Fe-Ni-BDC/CFC with different magnifications.

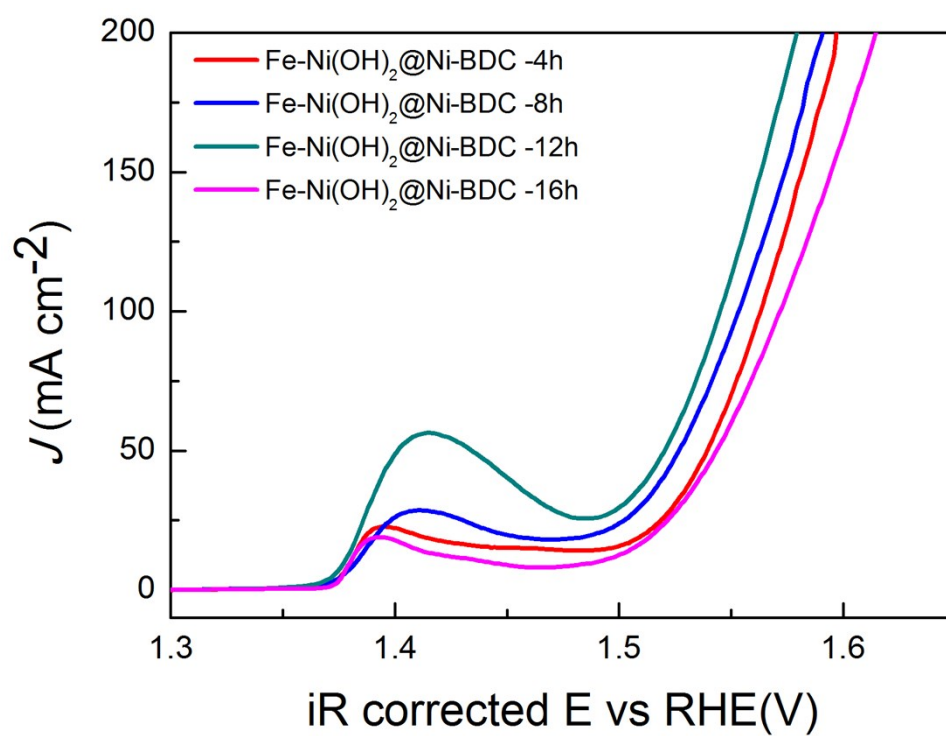

**Figure S4.** LSV curves of Fe-Ni(OH)<sub>2</sub>@Ni-BDC/CFC-X (X = 4, 8, 12, 16).

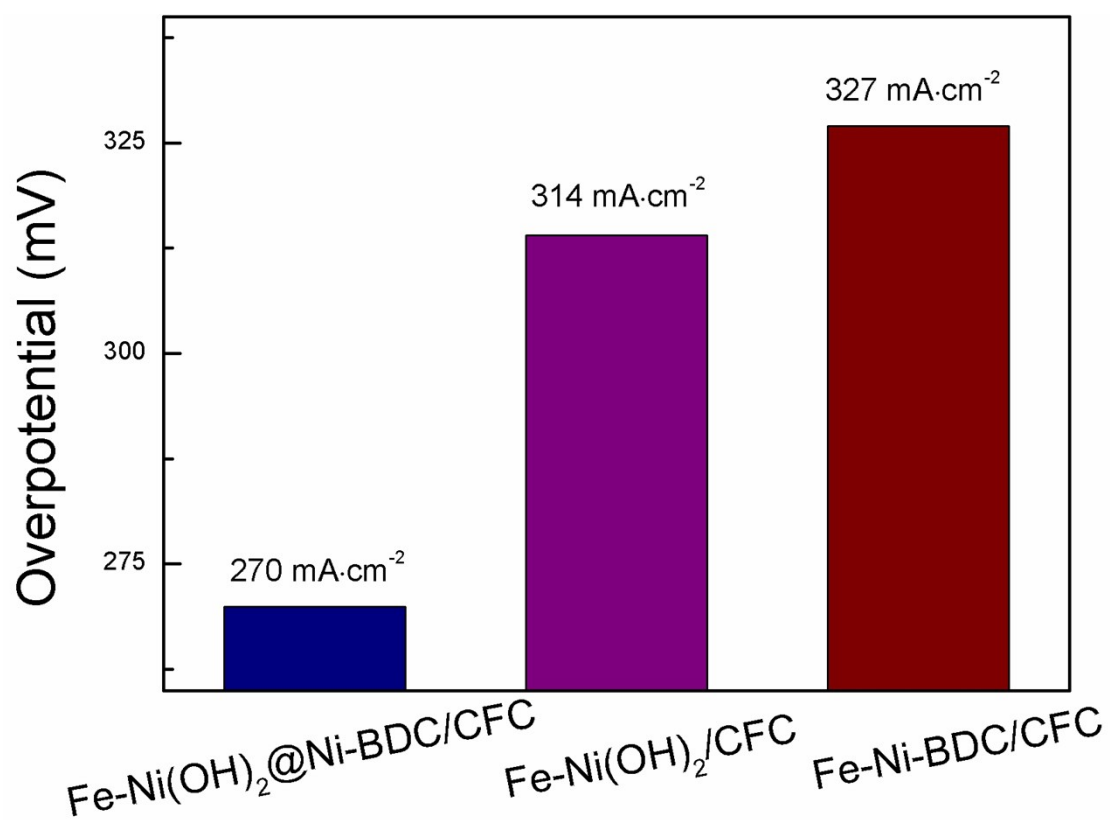

**Figure S5.** Overpotential of Fe-Ni(OH)<sub>2</sub>@Ni-BDC/CFC, Fe-Ni(OH)<sub>2</sub>/CFC and Fe-Ni-BDC/CFC at 30 mA cm<sup>-2</sup> Vs Ag/AgCl.

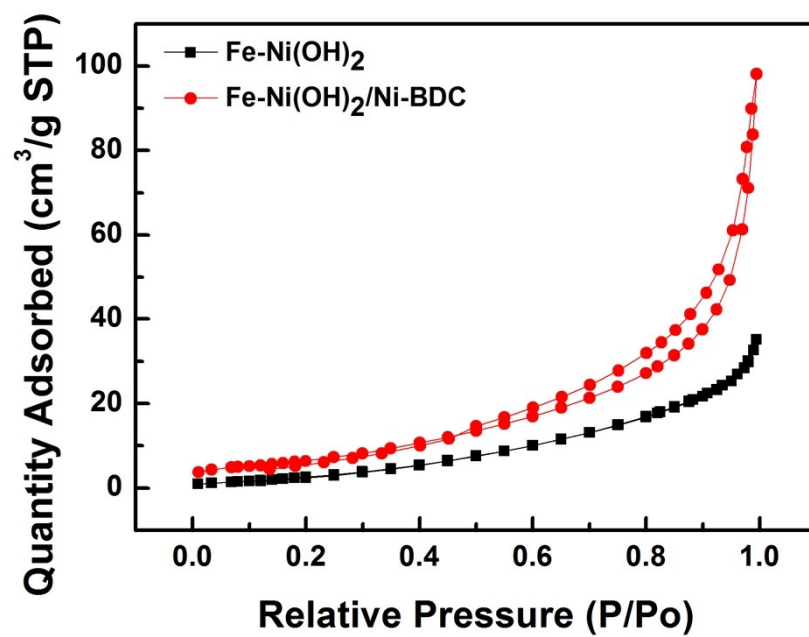

**Figure S6.** The nitrogen adsorption-desorption isotherm Fe-Ni(OH)<sub>2</sub> and Fe-Ni(OH)<sub>2</sub>@Ni-BDC/CFC.

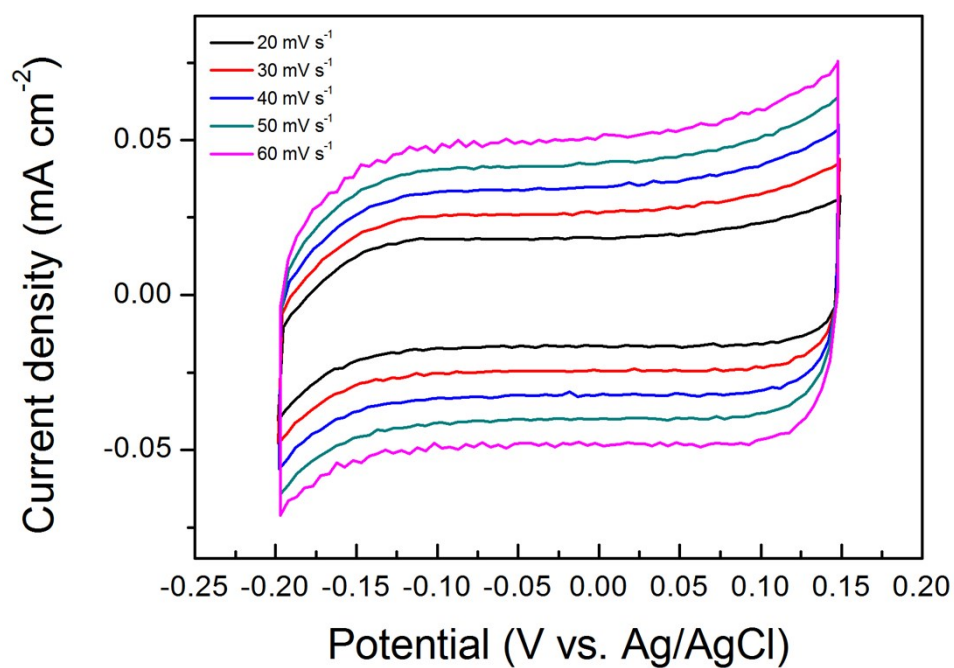

**Figure S7.** Cyclic voltammetry curves of Fe-Ni(OH)<sub>2</sub>/CFC at a scan rate of 20 to 60 mV/sv for determining their  $C_{dl}$  data.

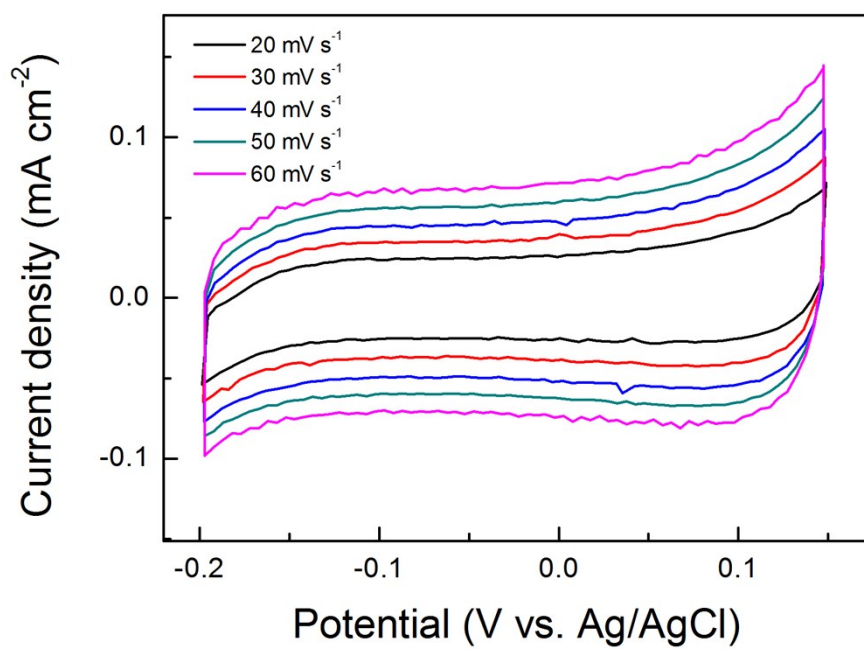

**Figure S8.** Cyclic voltammetry curves of Fe-Ni(OH)<sub>2</sub>@Ni-BDC/CFC at a scan rate of 20 to 60 mV s<sup>-1</sup> for determining their C<sub>dl</sub> data.



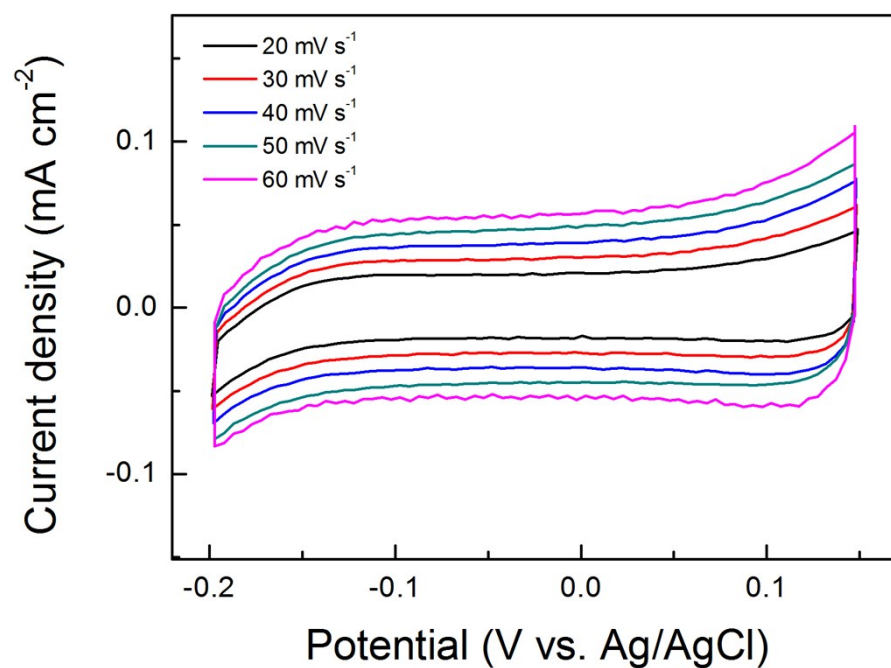

**Figure S9.** Cyclic voltammetry curves of Fe-Ni-BDC/CFC at a scan rate of 20 to 60  $\text{mV s}^{-1}$  for determining their  $C_{dl}$  data.

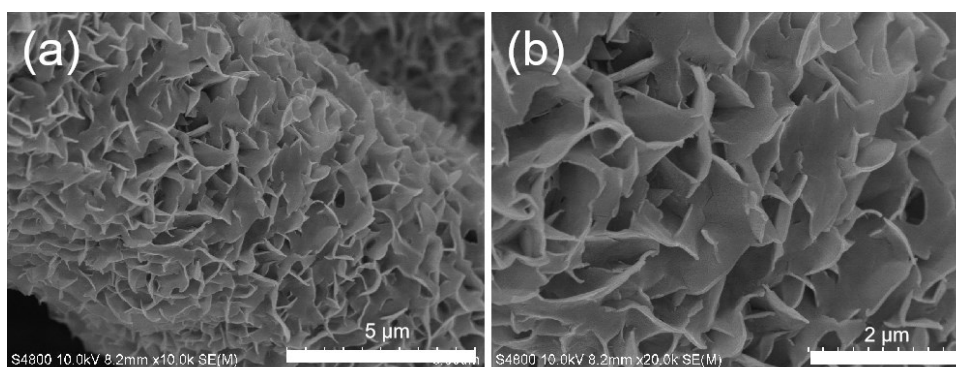

**Figure S10.** (a, b) SEM images with different magnifications of Fe-Ni(OH)<sub>2</sub>@Ni-BDC/CFC after electrocatalytic stability test.

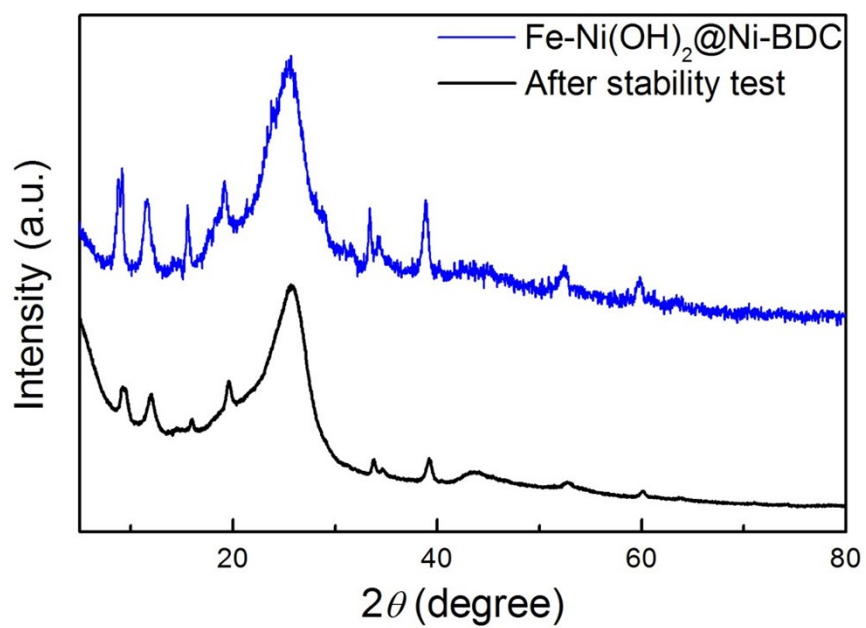

**Figure S11.** XRD diffraction pattern of Fe-Ni(OH)<sub>2</sub>@Ni-BDC/CFC before and after electrocatalytic stability test.

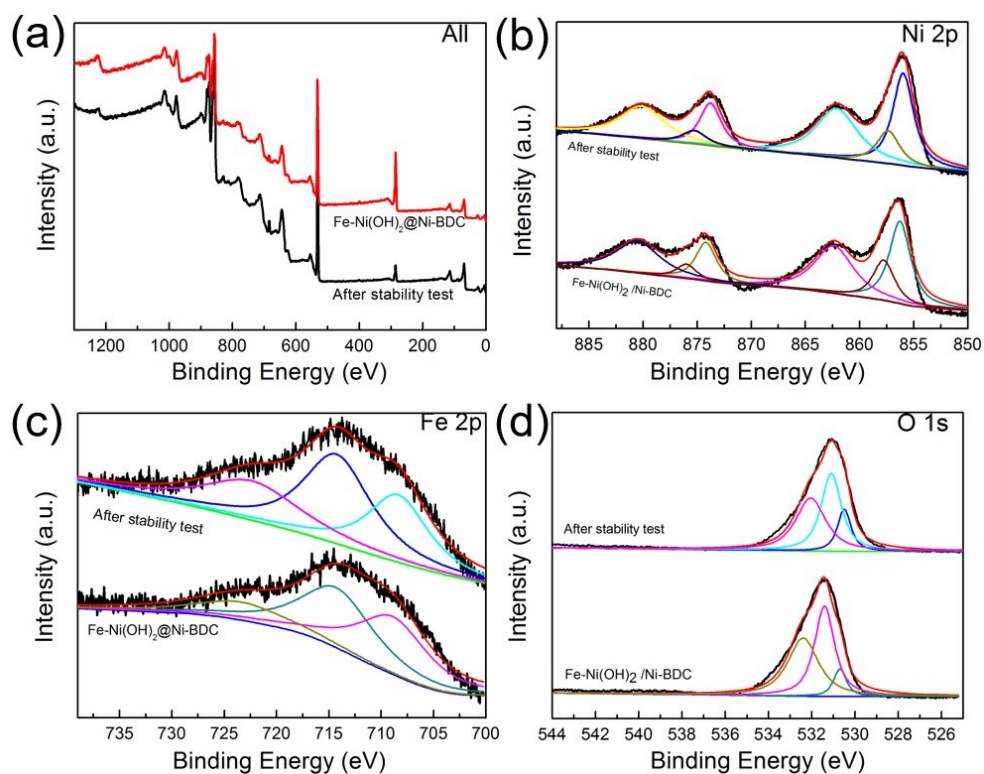

**Figure S12.** (a) XPS survey spectra for Fe-Ni(OH)<sub>2</sub>@Ni-BDC/CFC after stability test; (b) The Ni 2p XPS spectra for Fe-Ni(OH)<sub>2</sub>@Ni-BDC/CFC after stability test; (c) The Fe 2p XPS spectra for Fe-Ni(OH)<sub>2</sub>@Ni-BDC/CFC after stability test; (d) The O 1s XPS spectra for Fe-Ni(OH)<sub>2</sub>@Ni-BDC/CFC after stability test.

**Table S1.** Comparison of the OER performance of Fe-Ni(OH)<sub>2</sub>@Ni-BDC/CFC with some NiFe based catalysts.

| Catalyst                                 | Overpotential/mV             | Electrolyte | Reference                                   |
|------------------------------------------|------------------------------|-------------|---------------------------------------------|
| Fe-Ni(OH) <sub>2</sub> @Ni-BDC/CFC       | 270 @ 30 mA/cm <sup>2</sup>  | 1.0 M KOH   | This work                                   |
| NiCdFe                                   | 290 @ 10 mA/cm <sup>2</sup>  | 1.0 M KOH   | Appl Catal B-Environ<br>2018, 225, 1        |
| FeOOH/NiFe<br>LDHs@CCH<br>NAs-NF         | 330 @ 100 mA/cm <sup>2</sup> | 1.0 M KOH   | J. Mater. Chem. A,<br>2018, 6, 3397         |
| Ni-Fe-Co alloy<br>nanocones              | 310 @ 10 mA/cm <sup>2</sup>  | 1.0 M KOH   | J. Colloid. Interf. Sci.,<br>2019, 547, 407 |
| NiFe/C                                   | 300 @ 10 mA/cm <sup>2</sup>  | 1.0 M KOH   | ACS Catal.,<br>2016, 6, 4477                |
| NiCoFe-LDH                               | 280 @ 10 mA/cm <sup>2</sup>  | 1.0 M KOH   | Electrochim Acta.,<br>2016, 8, 5327         |
| (Ni, Fe)S <sub>2</sub> @MoS <sub>2</sub> | 270 @ 10 mA/cm <sup>2</sup>  | 1.0 M KOH   | Appl Catal B-Environ,<br>2019, 247, 107     |
| NiFe<br>hydroxysulfide                   | 286 @ 10 mA/cm <sup>2</sup>  | 1.0 M KOH   | Energy Environ. Sci.,<br>2020, 13, 1711     |
| S-doped NiFe-LDH                         | 300 @ 100 mA/cm <sup>2</sup> | 1.0 M KOH   | Energy Environ. Sci.,<br>2020, 13, 3439     |
